1 **Direct activation of endothelial cells by SARS-CoV-2 nucleocapsid protein is blocked by**  
2 **Simvastatin**

3

4 Yisong Qian<sup>1,2</sup>, Tianhua Lei<sup>1</sup>, Parth S. Patel<sup>1</sup>, Chi H Lee<sup>3</sup>, Paula Monaghan-Nichols<sup>1</sup>, Hong-Bo Xin<sup>2</sup>, Jianming  
5 Qiu<sup>4</sup>, and Mingui Fu<sup>1‡</sup>

6

7 <sup>1</sup>*Department of Biomedical Sciences and Shock/Trauma Research Center, School of Medicine, University of*  
8 *Missouri Kansas City, 2411 Holmes Street, Kansas City, MO 64108.* <sup>2</sup>*The National Engineering Research*  
9 *Center for Bioengineering Drugs and the Technologies, Institute of Translational Medicine, Nanchang*  
10 *University, 1299 Xuefu Rd, Honggu District, Nanchang, 330031, China.* <sup>3</sup>*Department of Pharmaceutics, School*  
11 *of Pharmacy, University of Missouri Kansas City, 2464 Charlotte Street, Kansas City, 64108;* <sup>4</sup>*Department of*  
12 *Microbiology, Molecular Genetics and Immunology, University of Kansas Medical Center, 3901 Rainbow*  
13 *Boulevard, Kansas City, KS 66160*

14

15 ‡Address correspondence to Mingui Fu, Department of Biomedical Sciences and Shock/Trauma Research  
16 Center, School of Medicine, University of Missouri Kansas City, 2411 Holmes Street, Kansas City, MO 64108.  
17 Tel.: 816-235-2193; Fax: 816-235-6444; E-mail: fum@umkc.edu.

18

19 **Running head:** N protein activates endothelial cells

20

21 Total character count in the manuscript: 8796

22 The character count includes ALL sections except the Materials and Methods and References: 6458

23

24

25

26

27

28 **ABSTRACT**

29 Emerging evidence suggests that endothelial activation plays a central role in the pathogenesis of acute  
30 respiratory distress syndrome (ARDS) and multi-organ failure in patients with COVID-19. However, the  
31 molecular mechanisms underlying endothelial activation in COVID-19 patients remain unclear. In this study, the  
32 SARS-CoV-2 viral proteins that potently activate human endothelial cells were screened to elucidate the  
33 molecular mechanisms involved with endothelial activation. It was found that nucleocapsid protein (NP) of  
34 SARS-CoV-2 significantly activated human endothelial cells through TLR2/NF- $\kappa$ B and MAPK signaling  
35 pathways. Moreover, by screening a natural microbial compound library containing 154 natural compounds,  
36 simvastatin was identified as a potent inhibitor of NP-induced endothelial activation. Remarkably, though the  
37 protein sequences of N proteins from coronaviruses are highly conserved, only NP from SARS-CoV-2 induced  
38 endothelial activation. The NPs from other coronaviruses such as SARS-CoV, MERS-CoV, HUB1-CoV and  
39 influenza virus H1N1 did not affect endothelial activation. These findings are well consistent with the results from  
40 clinical investigations showing broad endotheliitis and organ injury in severe COVID-19 patients. In conclusion,  
41 the study provides insights on SARS-CoV-2-induced vasculopathy and coagulopathy, and suggests that  
42 simvastatin, an FDA-approved lipid-lowering drug, may benefit to prevent the pathogenesis and improve the  
43 outcome of COVID-19 patients.

44

45

46 **Key words:** COVID-19, SARS-CoV-2, Nucleocapsid protein, endothelial activation, simvastatin.

47

48

49

50

51

52

53

## 54 INTRODUCTION

55 The emergence of severe acute respiratory syndrome coronavirus 2 (SARS-CoV-2), which causes the coronavirus  
56 disease 2019 (COVID-19), triggered a global pandemic that has led to an unprecedented worldwide public health  
57 crisis<sup>1</sup>. Before SARS-CoV-2, two other highly pathogenic coronaviruses emerged in the past two decades,  
58 including severe acute respiratory syndrome coronavirus (SARS-CoV)<sup>2</sup> and Middle East respiratory syndrome  
59 coronavirus (MERS-CoV)<sup>3</sup>. In addition, four endemic human coronaviruses (i.e., OC43, 229E, NL63 and HKU1)  
60 cause common cold respiratory diseases<sup>4</sup>. COVID-19 is characterized by progressive respiratory failure resulting  
61 from diffuse alveolar damage, inflammatory infiltrates, endotheliitis, and pulmonary and systemic coagulopathy  
62 forming obstructive microthrombi with multiorgan dysfunction<sup>5-8</sup>. Pathological findings of cell swelling, severe  
63 endothelial injury, disruption of intercellular junctions, and basal membrane contact loss in COVID-19 patients  
64 imply that the destruction of endothelial cells (ECs) leads to pulmonary vascular endotheliitis and alveolar  
65 capillary microthrombi<sup>9-12</sup>. Together, emerging evidence suggests that endothelial activation is an early hallmark  
66 of multiorgan damage in patients with COVID-19<sup>13</sup>. Moreover, thrombotic complications are a relevant cause of  
67 death in patients with COVID-19<sup>14</sup>. Therefore, understanding the molecular mechanisms of the endothelial  
68 activation caused by SARS-CoV-2 and pathways involved in the regulation of endothelial dysfunction could lead  
69 to new therapeutic strategies against COVID-19.

70 SARS-CoV-2 infects the host using angiotensin converting enzyme 2 (ACE2) as its receptor<sup>15</sup>. ACE2 is an  
71 integral membrane protein that is expressed by airways and lung alveolar epithelial cells, enterocytes, and  
72 vascular endothelial cells<sup>16</sup>. Though the primary target tissues of SARS-CoV-2 are airways and lungs, there is also  
73 evidence of direct viral infection of endothelial cells and diffuse endothelial inflammation in COVID-19 disease<sup>17</sup>.  
74 Moreover, vulnerable patients with pre-existing endothelial dysfunction, which is associated with male sex,  
75 smoking, hypertension, diabetes and obesity and established cardiovascular disease, are associated with adverse  
76 outcomes in COVID-19<sup>18</sup>. Together, these clinical findings suggest that endothelial cells play a central role in the  
77 pathogenesis of ARDS and multi-organ failure in patients with COVID-19. Therefore, the vascular system is  
78 increasingly being addressed as a major therapeutic target for defeating COVID-19.

79 The potential molecular mechanisms that SARS-CoV-2 induces endothelial activation, dysfunction and injury  
80 may contribute to the direct toxic effect of viral proteins. The genome of SARS-CoV-2 encodes 29 viral proteins  
81 including 16 non-structure proteins (NSP1-NSP16), 4 structure proteins including spike (S), membrane (M),  
82 nucleocapsid (N) and envelope (E) proteins and 9 accessory proteins<sup>19, 20</sup>. Though their functions in viral lifecycle  
83 are increasingly studied, their impacts on host cells are largely unknown. To determine whether distinct viral  
84 proteins can induce endothelial activation, recombinant SARS-CoV-2 proteins were evaluated for their potential  
85 to activate human endothelial cells. We found that N protein potently induced endothelial activation via Toll-like  
86 receptor 2 (TLR2)/NF- $\kappa$ B and MAPK signal pathways. To identify potential therapeutic agents targeting N  
87 protein-induced endothelial activation, a natural microbial compound library containing 154 natural compounds  
88 was screened and a single drug, simvastatin, was identified as specific inhibitor of N protein-induced endothelial  
89 activation. These results suggest that N protein released from SARS-CoV-2-infected cells may contribute to the  
90 broad activation of endothelium and tissue inflammation and simvastatin may benefit to prevent the viral  
91 infection-induced pathogenesis and improve the outcome of COVID-19 patients.

92

## 93 **RESULTS**

### 94 **Identification of nucleocapsid protein (NP) as a potent inducer of human endothelial cell activation**

95 To understand the molecular mechanisms that SARS-CoV-2 induces endothelial activation, we purchased eight  
96 recombinant SARS-CoV-2 viral proteins, including three structural proteins (S, N, and E proteins) and five non-  
97 structural proteins (NSP1, NSP3, NSP5, NSP7 and NSP8). The proteins were added to human primary lung  
98 microvascular endothelial cells (HLMCEs) for 8 hours. Western blotting was used to analyze the expression of  
99 ICAM-1 and VCAM-1, the markers of endothelial cell activation. As shown in **Fig.1a**, N protein significantly  
100 induced the expression of ICAM-1 and VCAM-1. TNF $\alpha$  is the most potent endogenous inducer of endothelial  
101 activation, which serves as a positive control. To further confirm the effect of N protein on endothelial cell  
102 activation, we incubated HLMCEs with different doses of N protein or for different incubation periods. As shown  
103 in **Fig.1b**, N protein induced ICAM-1 expression at 4 hours and continued to increase up to 24 hours, which was  
104 similar to the expression pattern induced by TNF $\alpha$ . Similar pattern of expression of VCAM-1 was also induced by

105 N protein. However, the expression of VE-cadherin, an EC junction structure protein, was not changed. In  
106 addition, N protein significantly induced ICAM-1 expression at 0.05  $\mu\text{g}/\text{ml}$  and more potent at 1  $\mu\text{g}/\text{ml}$ , which is  
107 comparable with the effect of  $\text{TNF}\alpha$  at 10  $\text{ng}/\text{ml}$  (**Fig.1c**). Next, we tested whether N protein also induced  
108 activation of other endothelial cells. Human umbilical vein endothelial cells (HUVEC), human aortic endothelial  
109 cells (HAEC), human coronal artery endothelial cells (HCAEC), human dermal microvascular endothelial cells  
110 (HDMEC), HLMEC, 293T, A549 and mouse lung vascular endothelial cells (MEC) were incubated with 1  $\mu\text{g}/\text{ml}$   
111 of N protein for 8 hours. As shown in **Fig.1d**, N protein significantly induced activation of all human endothelial  
112 cells tested, but not induced expression of ICAM-1 and VCAM-1 in 293T, A549 and mouse endothelial cells. We  
113 also probed the same blot using anti-mouse ICAM-1 and VCAM-1 antibodies, respectively, and confirmed that N  
114 protein did not induced mouse EC activation. To further confirm whether N protein induce the expression of  
115 adhesion molecules and proinflammatory cytokines at transcriptional level, we examined the changes of ICAM-1,  
116 VCAM-1, E-selectin,  $\text{TNF}\alpha$ , MCP-1 and IL-1 $\beta$  mRNA levels in NP-treated HLMECs. As shown in **Fig.1e**, N  
117 protein potently induced the expression of adhesion molecules, inflammatory cytokines and chemokines, which is  
118 similar to the function of  $\text{TNF}\alpha$ , a potent endogenous inducer of endothelial activation. The expression of ICAM-  
119 1 and VCAM-1 on the surface of endothelial cells contributes to the leukocytes adherence on endothelial cells<sup>21,22</sup>.  
120 To examine if N protein also induces the monocyte adherence to activated endothelial cells, HLMECs were  
121 stimulated with N protein (1  $\mu\text{g}/\text{ml}$ ) or  $\text{TNF}\alpha$  (10  $\text{ng}/\text{ml}$ ) for 8 hours and then the Zombie Red fluorescent-labelled  
122 human primary monocytes (Lonza) were co-cultured with the activated endothelial cells for 1 hour. After washed,  
123 the adherent cells were visualized by a fluorescent microscopy and counted in a double-blind way. As shown in  
124 **Fig.1f**, both N protein and  $\text{TNF}\alpha$  significantly increased monocyte adherence on ECs, compared with that in  
125 control group. Taken together, these results suggest that N protein is a potent inducer of endothelial cell  
126 activation, and it may play a key role in SARS-CoV-2-induced lung inflammation and multi-organ failure.

127

### 128 **N protein activated NF- $\kappa\text{B}$ and MAPK signaling pathways in human endothelial cells**

129 It is well known that the expression of ICAM-1 and VCAM-1 was controlled by MAPK and NF- $\kappa\text{B}$  signaling  
130 pathways<sup>23,24</sup>. To test if N protein can activate these signal pathways, HLMECs were incubated with NP (1  $\mu\text{g}/\text{ml}$ )

131 for 0, 15, 30, 45, 60 and 120 min, the cell lysates were analyzed by Western blot. As shown in **Fig.2**, NP  
132 treatment induced the phosphorylation of IKKs, p65 and I $\kappa$ B $\alpha$ , JNK, p38, and led to I $\kappa$ B $\alpha$  degradation. The time  
133 patterns of phosphorylation of these signaling molecules were similar to that of TNF $\alpha$ -induced activation of the  
134 signal pathways. Interested to note that S protein and LPS did not induce activation of NF- $\kappa$ B signaling, but  
135 weakly induced activation of MAPK pathways including ERK1/2, JNK and p38. These results suggest that N  
136 protein activated JNK, p38 and NF- $\kappa$ B signal pathways in human endothelial cells.

137

### 138 **N protein induced endothelial cell activation via TLR2-mediated signaling pathway**

139 Next, we investigated how N protein activates NF- $\kappa$ B and MAPK signaling pathways in human endothelial cells.  
140 First we test if N protein acts on cell surface receptors or intercellular signal proteins. Pretreatment with the  
141 inhibitors of endocytosis such as Pitstop2 and Dynasore hydrate did not affect NP-induced expression of ICAM-1  
142 and VCAM-1 (**Fig.3a**), suggesting that internalization of N protein is not required for its action on endothelial  
143 activation. Moreover, we transfected the expression plasmid encoding N protein into HLMECs. Though  
144 overexpression of N protein in endothelial cells, intercellular N protein did not induce the expression of ICAM-1  
145 and VCAM-1 (**Fig.3b**). Furthermore, incubation of HLMECs with N protein for different times showed that N  
146 protein bound to endothelial cells in a time-dependent manner (**Fig.3c**). These results suggest that N protein may  
147 bind to a kind of receptors on endothelial cells and trigger the NF- $\kappa$ B and MAPK signal pathways. Next,  
148 HLMECs were pretreated with antagonists of TLR2 (CU-CPT22), TLR4 (LPS-RS) and IL-1R (IL-1R antagonist)  
149 for 1 hour and then incubated with 1  $\mu$ g/ml of N protein for 8 hours. The expression of ICAM-1 and VCAM-1  
150 was detected by Western blotting. As shown in **Fig.3a**, TLR2 antagonist (CU-CPT22) significantly blocked NP-  
151 induced expression of ICAM-1 and VCAM-1 in human endothelial cells, suggesting that N protein may bind to  
152 TLR2 to trigger the activation of NF- $\kappa$ B and MAPK and induce endothelial activation. **Fig.3d** further showed that  
153 CU-CPT22 dose-dependently inhibited NP-induced expression of ICAM-1 and VCAM-1. To further confirm that  
154 N protein is able to activate TLR2, both wild-type 293T cells (without TLR2 expression) and TLR2-  
155 overexpressed 293T cells were treated with or without N protein. As shown in **Fig.3e**, N protein did not induce  
156 phosphorylation of JNK and p38 in wild-type 293T cells. However, N protein significantly induced

157 phosphorylation of JNK and p38 in 293T-TLR2 cells. Finally, as shown in **Fig.3a**, pretreatment with the  
158 inhibitors of IKK, JNK and p38 completely blocked NP-induced expression of ICAM-1 and VCAM-1. Taken  
159 together, these results suggest that N protein activates endothelial cells via TLR2-mediated NF- $\kappa$ B and MAPK  
160 signal pathways.

161

### 162 **Identification of simvastatin as an effective inhibitor of N protein-induced endothelial activation**

163 To screen the inhibitors of N protein-induced endothelial activation, 154 chemicals from microbial natural  
164 product library (Target Molecule, Wellesley Hills, MA) were added into individual wells of 48-well-plates at 30  
165  $\mu$ M 1 hour before the induction of N protein (1  $\mu$ g/ml). The effect of chemicals on endothelial activation was  
166 measured by Western blot with anti-ICAM-1 antibody. Among 154 chemicals, we found that 12 chemicals  
167 showed significant inhibition of N protein-induced ICAM-1 expression, which include Simvastatin, Lovastatin,  
168 Rapamycin, Cyclosporine A, Menadione, 1, 4-Naphthoquinone, L-Thyroxine, Thiostrepton, Monensin,  
169 Amphotericin B, Gramicidin and Abamectin (**Fig.4**). The later six are antibiotics which are toxic for cells and  
170 used in animals, not suitable for human use. Menadione and 1, 4-Naphthoquinone are vitamin K derivatives,  
171 which have anti-bacteria, anti-viral, anti-inflammation activities. Rapamycin and Cyclosporine A are  
172 immunosuppressant. Simvastatin and lovastatin are FDA-approved lowering blood lipid drugs with anti-  
173 inflammatory roles.

174

### 175 **Simvastatin is an effective inhibitor of N protein-induced endothelial activation in vitro**

176 To confirm the specific inhibitory role of simvastatin in N protein-induced endothelial activation, we compared  
177 the effect of simvastatin, lovastatin, atorvastatin, mevastatin and rosuvastatin. As shown in **Fig.5a**, among the five  
178 statins tested, simvastatin potently inhibited N protein-induced expression of ICAM-1 and VCAM-1. Consistent  
179 with the screening results, lovastatin showed mild effect on N protein-induced endothelial activation. The other  
180 three statins did not affect N protein-induced endothelial activation. We further confirmed the effect of  
181 simvastatin on N protein-induced endothelial activation in a dose-dependent manner (**Fig.5b**). Moreover, both  
182 simvastatin and lovastatin treatments significantly inhibited N protein-induced NF- $\kappa$ B activation (**Fig.5c**).

183 Consistently, simvastatin pretreatment also blocked monocyte adhesion to the activated endothelial cells (**Fig.5d**).  
184 Simvastatin is a member of the class of hexahydronaphthalenes like lovastatin in which the 2-methylbutyrate ester  
185 moiety has been replaced by a 2,2-dimethylbutyrate ester group. Simvastatin is derived from lovastatin.  
186 Lovastatin is a fatty acid ester that is mevastatin carrying an additional methyl group on the carbobicyclic  
187 skeleton. The structures of simvastatin, lovastatin and mevastatin are very similar. Mevastatin does not have a  
188 methyl group, however, both simvastatin and lovastatin have this group, which suggest that the group may be  
189 important for its inhibitor effect on N protein-induced endothelial activation (**Fig.6**).

190

### 191 **The N protein from SARS-CoV-2 but not the other coronaviruses potently induced endothelial cell** 192 **activation**

193 There are seven types of coronaviruses infecting humans including SARS-CoV-2, SARS-CoV, MERS-CoV,  
194 OC43-CoV, HKU1-CoV, 229E-CoV and NL63-CoV. The previous three are highly pathogenic and cause severe  
195 problems for humans. However, the later four are less pathogenic and only cause common cold. Though SARS-  
196 CoV and MERS-CoV display high sequence similarity with SARS-CoV-2, the patients infected with SARS-CoV-  
197 2 are commonly affected by vascular injury and thrombosis formation<sup>25</sup>, which was not observed in the patients  
198 infected with SARS-CoV and MERS-CoV. To understand the molecular basis of the pathogenesis, we compared  
199 the effect of different N proteins from SARS-CoV-2, SARS-CoV, MERS-CoV, HKU1-CoV as well as H7N9 on  
200 endothelial activation. Interestingly, as shown in **Fig.7**, only the N protein from SARS-CoV-2 potently induced  
201 endothelial activation. The other N proteins, though their sequence is highly conserved, did not affect endothelial  
202 activation (**Fig.7**). These results may explain why SARS-CoV-2-infected patients developed severe vascular  
203 injury and thrombosis and affected many organs.

204

### 205 **DISCUSSION**

206 Coronavirus disease 2019 (COVID-19), caused by SARS-CoV-2, is a worldwide challenge for health care system.  
207 The leading cause of mortality in patients with COVID-19 is ARDS and multi-organ failure. Emerging evidence  
208 suggests that pulmonary endothelial cells contribute to the initiation and progression of ARDS by altering vessel



209 barrier integrity, promoting a pro-coagulation state, inducing vascular inflammation (endotheliitis) and mediating  
210 inflammatory cell infiltration. However, the molecular mechanisms underlying SARS-CoV-2-induced endothelial  
211 activation and vascular injury remain unclear. Though some reports indicated direct infection of endothelial cells  
212 by SARS-CoV-2 in human samples, emerging evidence suggests that ACE2 is not highly expressed in human  
213 endothelial cells and SARS-CoV-2 is not able to infect human endothelial cells *in vitro*<sup>26</sup>. Thus, the direct damage  
214 of endothelial cells by SARS-CoV-2 infection cannot explain the broad endothelial dysfunction in COVID-19  
215 patients. The possible mechanisms by which SARS-CoV-2 infection causes endothelial activation may be  
216 attributed to the inflammatory and toxic roles of circulating viral proteins released from infected and lysed cells  
217 and inflammatory cytokines secreted from inflammatory and immune cells.

218 In the manuscript, we have screened the recombinant SARS-CoV-2 viral proteins that are able to activate  
219 human endothelial cells. We found that nucleocapsid protein (N protein) of SARS-CoV-2 potently activate  
220 endothelial cells through TLR2/NF- $\kappa$ B and MAPK signal pathways, by which N protein significantly induced the  
221 expression of ICAM-1 and VCAM-1 as well as other inflammatory cytokines and chemokines such as TNF $\alpha$ , IL-  
222 1 $\beta$  and MCP-1. As ICAM-1 and VCAM-1 are major adhesion molecules expressed on activated endothelial cells  
223 and mediated inflammatory cell infiltration into tissues, N protein may play a key role in the development of  
224 ARDS and multi-organ injury.

225 The N protein is highly abundant in the viruses. Its function involves entering the host cells, binding to the  
226 viral RNA genome and forms the ribonucleoprotein core to facilitate its replication and process the virus particle  
227 assembly and release<sup>27</sup>. Previous reports showed that the N protein from SARS-CoV and MERS-CoV were highly  
228 inflammatory nature to promote the expression of inflammatory cytokines, chemokines, prothrombinase and were  
229 able to induce acute lung inflammation in mouse model<sup>28-30</sup>. The N protein from hantavirus Andes virus increased  
230 basal endothelial cell permeability by activating RhoA signaling<sup>31</sup>. The effect of N protein from SARS-CoV-2 on  
231 host cells is less studied. In this manuscript, we report for the first time that the N protein from SARS-CoV-2 acts  
232 as a pathogen-associated molecular pattern (PAMP) to direct bind to TLR2 and activate NF- $\kappa$ B and MAPK  
233 signaling. In an unbiased survey of phosphorylation landscape of SARS-CoV-2 infection, SARS-CoV-2 infection  
234 is truly promoting activation of CK2 and p38 MAPK<sup>32</sup>. Moreover, a recent human study showed that the serum

235 levels of soluble ICAM-1 and VACM-1 were elevated in mild COVID-19 patients, dramatically elevated in  
236 severe cases, and decreased in the convalescence phase<sup>33</sup>. Taken together, the current study identified N protein as  
237 a potent factor to induce endothelial activation and provided the insights to understand the phenomenon of broad  
238 endothelial dysfunction and multi-organ injury that commonly appeared in severe COVID-19 patients.

239 Our study suggests that targeting on N protein may benefit to prevent or treat the pathogenesis and multi-  
240 organ injury in COVID-19 patients. By screening a natural microbial compound library containing 154 natural  
241 compounds, we identified simvastatin, an FDA-approved lipid-lowering drug, as a potent inhibitor of N protein-  
242 induced endothelial activation. Several groups have raised the idea that statins can be used as early therapy to  
243 mitigate COVID-19-associated ARDS and cytokine storm syndrome<sup>34-36</sup>. Several recent reports showed that in-  
244 hospital use of statins is associated with a reduced risk of mortality among individuals with COVID-19<sup>37-39</sup>. There  
245 were more than 20 statins available in clinical use. We tested five different statins. Only simvastatin showed  
246 potent inhibitory activity on N protein-induced endothelial activation. Lovastatin also showed mild inhibitory  
247 effect, which may be due to its structure is similar to simvastatin (**Fig.6**). As there are many reports showed that  
248 simvastatin has anti-inflammatory role<sup>40</sup>, it would be more effective in the treatment of COVID-19 patients by  
249 multiple mechanisms. Our results justify that simvastatin may be more benefit for the treatment of COVID-19 by  
250 potently suppressing endothelial activation.

251 Many patients with severe COVID-19 show signs of a cytokine storm<sup>41</sup>. The high levels of cytokines amplify  
252 the destructive process by leading to EC activation, DIC, inflammation and vasodilation of the pulmonary  
253 capillary bed. This results in alveolar dysfunction, ARDS with hypoxic respiratory failure and ultimately multi-  
254 organ failure and death. EC dysfunction and activation likely co-determine this uncontrolled immune response.  
255 This is because ECs promote inflammation by expressing leukocyte adhesion molecules, thereby facilitating the  
256 accumulation and extravasation of leukocytes, including neutrophils and monocytes/macrophages, which enhance  
257 tissue damage. One recent report showed that SARS-CoV-2 N protein robustly induced proinflammatory  
258 cytokines/chemokines in human primary PMBCs<sup>42</sup>, suggesting that circulating N protein may also contribute to  
259 the initiation and progression of cytokine storm. Remarkably, though the protein sequences of N proteins from  
260 coronaviruses are highly conserved, only NP from SARS-CoV-2 induced endothelial activation. The NPs from

261 other coronaviruses such as SARS-CoV, MERS-CoV, HKU1-CoV and influenza virus H1N1 did not affect  
262 endothelial activation. Thus, these findings are well consistent with the results from clinical investigations.

263 In summary, our present study identified SARS-CoV-2 N protein as a potent inducer of human endothelial  
264 activation, which can be specifically inhibited by simvastatin. The study provides insights on SARS-CoV-2-  
265 induced vasculopathy and coagulopathy, and suggests that simvastatin, an FDA-approved lipid-lowering drug,  
266 may benefit to prevent vascular pathogenesis and improve the outcome of COVID-19 patients.

267

## 268 **METHODS**

### 269 **Reagents**

270 SARS-CoV-2 nucleocapsid protein (NUN-C5227), S protein (SPN-C52H4) and envelope protein (ENN-C5128)  
271 were from Acrobiosystems (Newark, DE). SARS-CoV-2 NSP1 (97-095), NSP5 (10-116), NSP7 (97-096) and  
272 NSP8 (97-097) proteins were obtained from Prosci (Poway, CA). SARS-CoV-2 papain-like protease (DB604)  
273 was purchased from Lifesensors (Malvern, PA). HCoV-HKU1 coronavirus nucleocapsid protein, H7N9  
274 Nucleocapsid Protein (40110-V08B), MERS-CoV Nucleoprotein protein (40068-V08B) and SARS Coronavirus  
275 Nucleocapsid Protein (40143-V08B) were from Sino biological (Beijing, China). Mammalian expression plasmid  
276 for SARS-CoV-2 nucleocapsid protein (152536) was obtained from addgene (Watertown, MA). ICAM-1 (60299-  
277 1-Ig) and GAPDH (60004-1-Ig) antibodies were from Proteintech (Rosemont, IL). VCAM-1 (sc-8304) and  $\beta$ -  
278 actin (sc-47778) antibodies were obtained from Santa Cruz Biotechnology, Inc (Dallas, TX). SARS-CoV/SARS-  
279 CoV-2 Nucleocapsid Antibody (40143-MM05) and SARS-CoV-2 Nucleocapsid antibody (40588-T62) were from  
280 Sino biological (Beijing, China). The NF- $\kappa$ B and MAPK signal pathway antibodies were all from Cell Signaling  
281 Technology (Danvers, MA).

282

### 283 **Cells**

284 Human umbilical vein endothelial cells (HUVEC), Human Aortic Endothelial Cells (HAEC), Human Coronary  
285 Artery Endothelial Cells (HCAEC), Human Dermal Microvascular Endothelial Cells (HDMEC) and Human Lung  
286 Microvascular Endothelial Cells (HLMEC) were purchased from Lonza Bioscience (Houston, TX). Mouse lung

287 microvascular endothelial cells were obtained from Cell Biologics Inc (Chicago, IL). Cells were cultured in  
288 different endothelial cell growth medium in a humidified incubator with 5% CO<sub>2</sub> at 37°C. Endothelial cells  
289 between passages 4 and 8 were grown as a monolayer and were used in all the experiments. HLMEC were treated  
290 with vehicle (PBS) or various SARS-CoV-2 proteins, including nucleocapsid protein (NP), S protein (SP),  
291 envelope protein (EP), NSP1, NSP3, NSP5, NSP7 and NSP8 at 1 µg/mL for 8 h. In another set of experiment,  
292 HLMECs were treated with different coronavirus nucleocapsid proteins, including SARS-CoV-2 NP, SARS-CoV  
293 NP, MERS NP, H7N9 NP and HCoV-HKU1 NP at 1 µg/mL for 8 h. Different subtypes of endothelial cells were  
294 also used to observe the response to NP stimulation. For time course assay, HLMECs were incubated with 1  
295 µg/mL SARS-CoV-2 NP for 2 h, 4 h, 8 h, 16 h and 24 h, respectively. For dose-dependent assay, HLMECs were  
296 treated with various concentrations of SARS-CoV-2 NP ranging from 0.01-10 µg/mL. For NF-κB and MAPK  
297 signal pathway assay, HLMECs were subject to SARS-CoV-2 NP exposure for 15 min, 30 min, 45 min, 1 h and 2  
298 h, respectively. TNFα (10 ng/mL, PeproTech, Cranbury, NJ) was used in all above experiments as a positive  
299 control of endothelial activation.

300

### 301 **Transfection of plasmids**

302 Flag-NP and Flag-control vectors were transfected to HLMEC by electroporation using Nucleofector device  
303 (Lonza) and Nucleofector kits (Lonza, VPB-1002) following the manufacturer's instruction. The whole cell  
304 lysates were harvested 48 h after electroporation and were analyzed by western blot.

305

### 306 **Chemical screening**

307 To screen for inhibitors of NP-induced endothelial activation, HLMECs were pretreated by 30 µM/L of individual  
308 chemical from microbial natural product library (Target Molecule, Wellesley Hills, MA) for 1 h followed by  
309 treatment of 1 µg/ml of N protein for 8 h. The effect of chemicals on endothelial activation were measured by  
310 ICAM-1 expression. To evaluate the inhibitory effects of statins on NP-induced endothelial activation, HLMECs  
311 were pretreated with atorvastatin, lovastatin, mevastatin, rosuvastatin or simvastatin (all from Biovision, Milpitas,

312 CA) for 1 h and followed by the treatment of N protein (1 µg/ml) for 8 h. The whole cell lysates were harvested  
313 and analyzed by western blot.

314

### 315 **Inhibitor treatment**

316 The antagonists or inhibitors involved in NF-κB and MAPK signal pathway were introduced to verify the action  
317 of NP. The endocytosis inhibitors Pitstop 2 (12.5 µM, Sigma) and Dynasore hydrate (12.5 µM, Sigma), the TLR4  
318 antagonist LPS-RS (10 µg/mL, InVivoGen, San Diego, CA), the TLR1/TLR2 antagonist CU-CPT22 (20 µM,  
319 Millipore, Burlington, MA), the IL-1R antagonist (20 µM, Cayman Chemical Company), IKK-16 (20 µM,  
320 Cayman Chemical Company), the JNK inhibitor V (20 µM, Cayman Chemical Company), the ERK1/2 inhibitor  
321 U0126 (20 µM, Cell Signal Technology), and the p38 inhibitor SB203580 (20 µM, Enzo Life Sciences,  
322 Farmingdale, NY) were added into HLMEC cultures 1 h before NP exposure. The whole cell lysates were  
323 harvested 8 h after NP stimulation and analyzed by western blot.

324

### 325 **NP-induced NF-κB and MAPK activation in 293T-TLR2 cells**

326 293T overexpressed human TLR2 was use to confirm the interaction between NP and TLR2, Wild type 293T and  
327 293T-TLR2 (InVivoGen) cells were cultured in DMEM supplemented with 10% FBS. The cells were treated with  
328 or without NP (1 µg/ mL) for 15 mins. The cells were harvested and the whole cell lysates were subjected to  
329 detection of pJNK and pP38 by western blot.

330

### 331 **QPCR**

332 Total RNA was isolated from HLMEC after 8 h of NP exposure with the RNeasy Mini Kit (Qiagen, Germantown,  
333 MD) according to the manufacturer's instructions. The first-strand cDNAs were synthesized by the High Capacity  
334 RNA-to-cDNA Kit (Thermo Fisher Scientific, Vilnius, Lithuania). The reaction mixture contained 2×SYBR  
335 Green PCR Master Mix (Applied Biosystems, Foster City, CA, USA), primer pairs and cDNAs. The reaction  
336 consisted of a 2-step thermocycling protocol (95 °C for 15 s and 60 °C for 1 min; 40 cycles). The mRNA levels

337 were calculated by using the  $2^{-\Delta\Delta CT}$  method. The Primer sequences used in the experiment were listed in Table S1.

338 Results were obtained from at least three biological replications performed in triplicate.

339

#### 340 **Western blot**

341 The total protein was collected with ice cold RIPA lysis buffer after NP stimulation. Equal amounts of protein

342 were loaded into the wells of the SDS-PAGE gel and separated by electrophoresis. Then the protein were

343 transferred to the PVDF membrane. The 5% (w/v) skim milk were used to block the un-specific binding.

344 Membranes were incubated with different primary antibodies at 4 °C overnight, followed by incubation with

345 HRP-conjugated secondary antibodies for 1 h at room temperature. Luminescence was generated after the

346 membranes were exposed to Super Signal West Pico Chemiluminescent Substrate (Thermo Fisher Scientific) and

347 was detected with X-ray film.

348

#### 349 **Monocyte adhesion assay**

350 Monocyte adhesion was analyzed as previously described<sup>43</sup>, with some modification. HLMECs were stimulated

351 with NP or TNF- $\alpha$  for 8 h. The human acute monocytic leukemia cell line THP-1 (Lonza) was pre-labeled with

352 Zombie Red fluorescent dye (Biolegend, San Diego, CA) in RPMI-1640 medium for 30 min at 37°C before being

353 added to HLMECs and co-cultured for 1 h. Non-adherent cells were removed by gently washing with cold RPMI-

354 1640 medium. The images of adherent THP-1 cells were taken under Cytation 3 Cell Imaging Multi-mode

355 Reader.

356

#### 357 **Statistical Analyses**

358 Data were obtained from at least three independent experiments and were represented as mean  $\pm$  SD. Statistical

359 differences were compared using one-way ANOVA followed by a Tukey post hoc test. An unpaired Student's t-

360 test was performed to compare data between two independent groups. A difference with  $P < 0.05$  was considered

361 statistically significant. A p-value less than 0.05 was considered statistically significant.

362

363 **ACKNOWLEDGMENTS**

364 We thank Dr. Peter Klein (University of Pennsylvania) for providing SARS-CoV2 Nucleocapsid plasmid via  
365 Addgene.com. This work was supported by National Institutes of Health Grant AI138116 (to M.F). J.Q. was  
366 supported by National Institute of Health Grant AI150877 and AI144564. Y.Q was supported by China  
367 Scholarship Council (20190682503)

368

369 **AUTHOR CONTRIBUTIONS**

370 M.F. and Y. Q designed the research and analyzed data; Y.Q., T.L., and P.P did the experiments; C.L, P.N., J.Q  
371 and H-B. X provided advice and critically read the manuscript; M.F and Y.Q wrote the manuscript.

372

373 **DECLARE OF CONFLICT OF INTERESTS**

374 The authors have no conflict of interests to declare.

375

376 **REFERENCES**

- 377 1. Ackermann, M., Verleden, S.E., Kuehnel, M., Haverich, A., Welte, T., et al. Pulmonary Vascular  
378 Endothelialitis, Thrombosis, and Angiogenesis in Covid-19. *N. Engl. J. Med.* 383, 120-128 (2020).
- 379 2. Kirtipal, N., Bharadwaj, S., Kang, S.G. From SARS to SARS-CoV-2, insights on structure, pathogenicity and  
380 immunity aspects of pandemic human coronaviruses. *Infect. Genet. Evol.* 85, 104502 (2020).
- 381 3. de Wit, E., van Doremalen, N., Falzarano, D., Munster, V.J. SARS and MERS: recent insights into emerging  
382 coronaviruses. *Nat. Rev. Microbiol.* 14, 523-34 (2016).
- 383 4. Liu, D.X., Fung, T.S., Chong, K.K., Shukla, A., Hilgenfeld, R. Accessory proteins of SARS-CoV and other  
384 coronaviruses. *Antiviral Res.* 109, 97-109 (2014).
- 385 5. Guan, W.J., Ni, Z.Y., Hu, Y., Liang, W.H., Ou, C.Q., et al. Clinical Characteristics of Coronavirus Disease  
386 2019 in China. *N. Engl. J. Med.* 382, 1708-1720 (2020).
- 387 6. Carnevale, S., Beretta, P., Morbini, P. Direct endothelial damage and vasculitis due to SARS-CoV-2 in small  
388 bowel submucosa of COVID-19 patient with diarrhea. *J. Med. Virol.* 10, 1002 (2020).

- 389 7. Vrints, C.J.M., Krychtiuk, K.A., Van Craenenbroeck, E.M., Segers, V.F., Price, S., Heidbuchel, H.  
390 Endothelialitis plays a central role in the pathophysiology of severe COVID-19 and its cardiovascular  
391 complications. *Acta. Cardiol.* 2, 1-16 (2020).
- 392 8. Fraser, D.D., Patterson, E.K., Slessarev, M., Gill, S.E., Martin, C., et al. Endothelial Injury and Glycocalyx  
393 Degradation in Critically Ill Coronavirus Disease 2019 Patients: Implications for Microvascular Platelet  
394 Aggregation. *Crit. Care Explor.* 2, e0194 (2020).
- 395 9. Guervilly, C., Burtsey, S., Sabatier, F., Cauchois, R., Lano, G., et al. Circulating Endothelial Cells as a Marker  
396 of Endothelial Injury in Severe COVID -19. *J. Infect. Dis.* 222, 1789-1793 (2020).
- 397 10. Huertas, A., Montani, D., Savale, L., Pichon, J., Tu, L., et al. Endothelial cell dysfunction: a major player in  
398 SARS-CoV-2 infection (COVID-19)? *Eur. Respir. J.* 56, 2001634 (2020).
- 399 11. Lei, Y., Zhang, J., Schiavon, C.R., He, M., Chen, L., et al. SARS-CoV-2 Spike Protein Impairs Endothelial  
400 Function via Downregulation of ACE2. *bioRxiv.* 12, 04.409144 (2020).
- 401 12. Wang, P., Luo, R., Zhang, M., Wang, Y., Song, T., et al. A cross-talk between epithelium and endothelium  
402 mediates human alveolar-capillary injury during SARS-CoV-2 infection. *Cell Death Dis.* 11, 1042 (2020).
- 403 13. Teuwen, L.A., Geldhof, V., Pasut, A., Carmeliet, P. COVID-19: the vasculature unleashed. *Nat. Rev.*  
404 *Immunol.* 20, 389-391 (2020).
- 405 14. Pons, S., Fodil, S., Azoulay, E., Zafrani, L. The vascular endothelium: the cornerstone of organ dysfunction  
406 in severe SARS-CoV-2 infection. *Crit. Care.* 24, 353 (2020).
- 407 15. Lan, J., Ge, J., Yu, J., Shan, S., Zhou, H., et al. Structure of the SARS-CoV-2 spike receptor-binding domain  
408 bound to the ACE2 receptor. *Nature.* 581, 215-220 (2020).
- 409 16. Albini, A., Di Guardo, G., Noonan, D.M., Lombardo, M. The SARS-CoV-2 receptor, ACE-2, is expressed  
410 on many different cell types: implications for ACE-inhibitor- and angiotensin II receptor blocker-  
411 based cardiovascular therapies. *Intern Emerg. Med.* 15, 759-766 (2020).
- 412 17. Bhatnagar, J., Gary, J., Reagan-Steiner, S., Estetter, L.B., Tong, S., et al. Evidence of SARS-CoV-2  
413 Replication and Tropism in the Lungs, Airways and Vascular Endothelium of Patients with Fatal COVID-19: An  
414 Autopsy Case-Series. *J Infect Dis.* 27, jia039 (2021).



- 415 18. Korakas, E., Ikonomidis, I., Kousathana, F., Balampanis, K., Kountouri, A., et al. Obesity and COVID-19:  
416 immune and metabolic derangement as a possible link to adverse clinical outcomes. *Am. J. Physiol. Endocrinol.*  
417 *Metab.* 319, E105-E109 (2020).
- 418 19. Lu, R., Zhao, X., Li, J., Niu, P., Yang, B., et al. Genomic characterisation and epidemiology of 2019 novel  
419 coronavirus: implications for virus origins and receptor binding. *Lancet.* 395, 565-574 (2020).
- 420 20. Forster, P., Forster, L., Renfrew, C., Forster, M. Phylogenetic network analysis of SARS-CoV-2 genomes.  
421 *Proc. Natl. Acad. Sci. U S A.* 117, 9241-9243 (2020).
- 422 21. Wawryk, S.O., Novotny, J.R., Wicks, I.P., Wilkinson, D., Maher, D., et al. The role of the LFA-1/ICAM-1  
423 interaction in human leukocyte homing and adhesion. *Immunol. Rev.* 108, 135-61 (1989).
- 424 22. Yong, K., Khwaja, A. Leucocyte cellular adhesion molecules. *Blood Rev.* 4, 211-25 (1990).
- 425 23. Fusté, B., Mazzara, R., Escolar, G., Merino, A., Ordinas, A., Díaz-Ricart, M. Granulocyte colony-  
426 stimulating factor increases expression of adhesion receptors on endothelial cells through activation of p38  
427 MAPK. *Haematologica.* 89, 578-85 (2004).
- 428 24. Iademarco, M.F., McQuillan, J.J., Rosen, G.D., Dean, D.C. Characterization of the promoter for vascular  
429 cell adhesion molecule-1 (VCAM-1). *J. Biol. Chem.* 267, 16323-9 (1992).
- 430
- 431 25. Rodríguez, C., Luque, N., Blanco, I., Sebastian, L., Barberà, J.A., et al. Pulmonary Endothelial Dysfunction  
432 and Thrombotic Complications in COVID-19 Patients. *Am. J. Respir. Cell Mol. Biol.* 2020 Nov 12. doi:  
433 10.1165/rcmb.2020-0359PS.
- 434 26. Nascimento, C.J., Schutt, W.R., Gorbunova, E.E., Mackow, E.R. Recombinant ACE2 Expression Is  
435 Required for SARS-CoV-2 To Infect Primary Human Endothelial Cells and Induce Inflammatory and  
436 Procoagulative Responses. *mBio.* 11, e03185-20 (2020).
- 437 27. Khan, A., Tahir Khan, M., Saleem, S., Junaid, M., Ali, A., et al. Structural insights into the mechanism of  
438 RNA recognition by the N-terminal RNA-binding domain of the SARS-CoV-2 nucleocapsid phosphoprotein.  
439 *Comput. Struct. Biotechnol. J.* 18, 2174-2184 (2020).
- 440 28. Chang, C.K., Hou, M.H., Chang, C.F., Hsiao, C.D., Huang, T.H. The SARS coronavirus nucleocapsid  
441 protein--forms and functions. *Antiviral Res.* 103, 39-50 (2014).

- 442 29. Aboagye, J.O., Yew, C.W., Ng, O.W., Monteil, V.M., Mirazimi, A., Tan, Y.J. Overexpression of the  
443 nucleocapsid protein of Middle East respiratory syndrome coronavirus up-regulates CXCL10. *Biosci. Rep.* 38,  
444 BSR20181059 (2018).
- 445 30. Zhu, Y.G., Qu, J.M. Differential characteristics of the early stage of lung inflammation induced by SARS-  
446 CoV Nucleocapsid protein related to age in the mouse. *Inflamm. Res.* 58, 312-20 (2009).
- 447 31. Gorbunova, E.E., Simons, M.J., Gavrilovskaya, I.N., Mackow, E.R. The Andes Virus Nucleocapsid Protein  
448 Directs Basal Endothelial Cell Permeability by Activating RhoA. *mBio.* 7, e01747-16 (2016).
- 449 32. Bouhaddou, M., et al. The Global Phosphorylation Landscape of SARS-CoV-2 Infection. *Cell.* 182, 685-  
450 712.e19 (2020).
- 451 33. Tong, M., Jiang, Y., Xia, D., Xiong, Y., Zheng, Q., et al. Elevated Expression of Serum Endothelial Cell  
452 Adhesion Molecules in COVID-19 Patients. *J. Infect. Dis.* 222, 894-898 (2020).
- 453 34. Gordon, D. Statins may be a key therapeutic for Covid-19. *Med. Hypotheses.* 144, 110001 (2020).
- 454 35. Lima Martínez, M.M., Contreras, M.A., Marín, W., D'Marco, L. Statins in COVID-19: is there any  
455 foundation? *Clin. Investig. Arterioscler.* 32, 278-281 (2020).
- 456 36. Teoh, N., Farrell, G. Statins as early therapy to mitigate COVID-19 (SARS-CoV-2)-associated ARDS and  
457 cytokine storm syndrome - time is of the essence. *J. Clin. Transl. Res.* 5, 227-229 (2020).
- 458 37. Tan, W.Y.T., Young, B.E., Lye, D.C., Chew, D.E.K., Dalan, R. Statin use is associated with lower disease  
459 severity in COVID-19 infection. *Sci. Rep.* 10, 17458 (2020).
- 460 38. Zhang, X.J., Qin, J.J., Cheng, X., Shen, L., Zhao, Y.C., et al. In-Hospital Use of Statins Is Associated with a  
461 Reduced Risk of Mortality among Individuals with COVID-19. *Cell Metab.* 32, 176-187.e4 (2020).
- 462 39. Bifulco, M., Gazzo, P. Statin therapy in COVID-19 infection: much more than a single pathway. *Eur.*  
463 *Heart J. Cardiovasc. Pharmacother.* 6, 410-411 (2020).
- 464 40. Crespo, M.J., Quidgley, J. Simvastatin, atorvastatin, and pravastatin equally improve the hemodynamic  
465 status of diabetic rats. *World J. Diabetes.* 6, 1168-78 (2015).
- 466 41. Wang, J., Jiang, M., Chen, X., Montaner, L.J. Cytokine storm and leukocyte changes in mild versus severe  
467 SARS-CoV-2 infection: Review of 3939 COVID-19 patients in China and emerging pathogenesis and therapy  
468 concepts. *J. Leukoc. Biol.* 108, 17-41 (2020).

- 469 42. Sohn, K.M., Lee, S.G., Kim, H.J., Cheon, S., Jeong, H., et al. COVID-19 Patients Upregulate Toll-like  
470 Receptor 4-mediated Inflammatory Signaling That Mimics Bacterial Sepsis. *J. Korean Med. Sci.* 35, e343  
471 (2020).
- 472 43. Li, Y., Huang, X., Guo, F., Lei, T., Li, S., et al. TRIM65 E3 ligase targets VCAM-1 degradation to limit  
473 LPS-induced lung inflammation. *J. Mol. Cell Biol.* 12, 190-201 (2020).
- 474
- 475
- 476
- 477
- 478
- 479
- 480
- 481
- 482
- 483
- 484
- 485
- 486
- 487
- 488
- 489
- 490
- 491
- 492
- 493
- 494
- 495

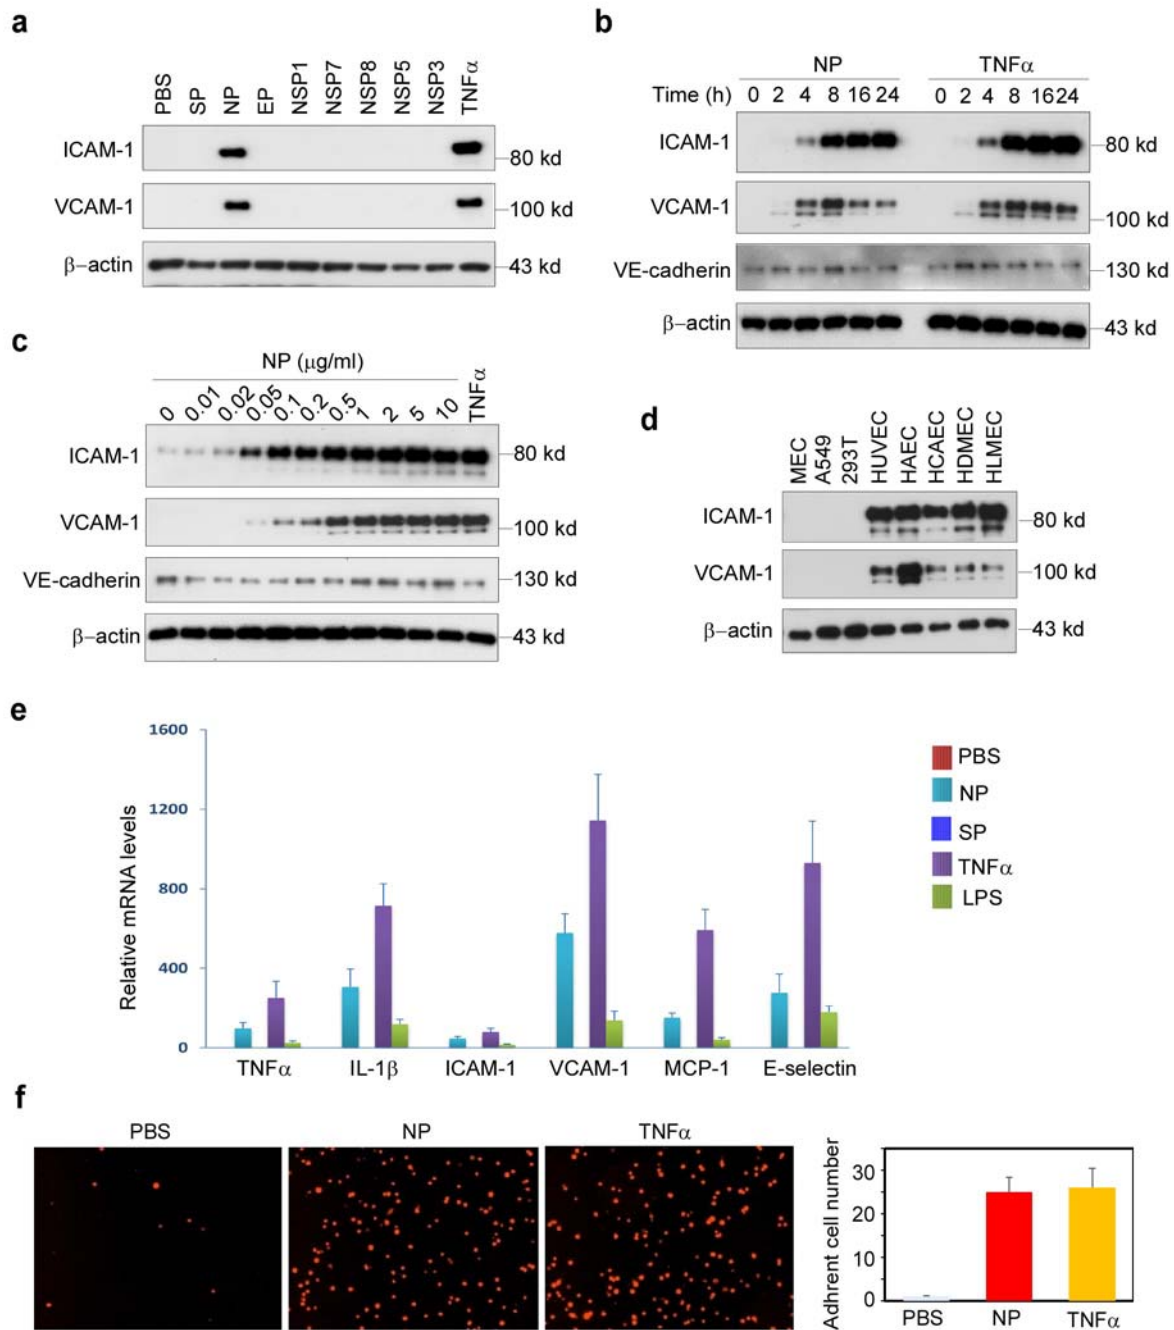

496  
497  
498  
499  
500  
501  
502  
503  
504  
505  
506  
507  
508  
509  
510

**Figure 1. SARS-CoV2 nucleocapsid protein (NP) is a potent inducer of human endothelial cell activation.** (a) HLMECs were incubated with SARS-CoV2 structural proteins (S, N, and E proteins, 1  $\mu$ g/mL) and five non-structural proteins (NSP1, NSP3, NSP5, NSP7 and NSP8, 1  $\mu$ g/mL) for 8 hrs. (b) HLMECs were treated with 1  $\mu$ g/mL of NP or 10 ng/ml of TNF $\alpha$  for different incubation periods as indicated. (c) HLMECs were incubated with indicated concentrations of NP for 8 hrs. 10 ng/ml of TNF $\alpha$  serves as positive control. (d) Different cultured cells including mouse lung vascular endothelial cells (MEC), A549, 293T, HUVEC, HAEC, HCAEC, HDMEC and HLMEC were treated with NP (1  $\mu$ g/mL) for 8 hrs. The expression of ICAM-1, VCAM-1 and VE-cadherin was detected by western blot.  $\beta$ -actin was served as loading control. (e) HLMECs were treated with PBS, NP (1  $\mu$ g/ml), TNF $\alpha$  (10 ng/ml) or LPS (1  $\mu$ g/ml) for 8 hours. The total RNA was isolated and QPCR was performed for measuring the mRNA levels of TNF $\alpha$ , ICAM-1, VCAM-1, MCP-1 and IL-6. (f) HLMECs were treated with PBS, NP (1  $\mu$ g/ml) or TNF $\alpha$  (10 ng/ml) for 8 hours and co-cultured with Zombie Red-labeled THP-1 cells for 1h. After washing, the adherent cells were imaged and quantitatively analyzed.

511  
512  
513  
514  
515  
516  
517  
518

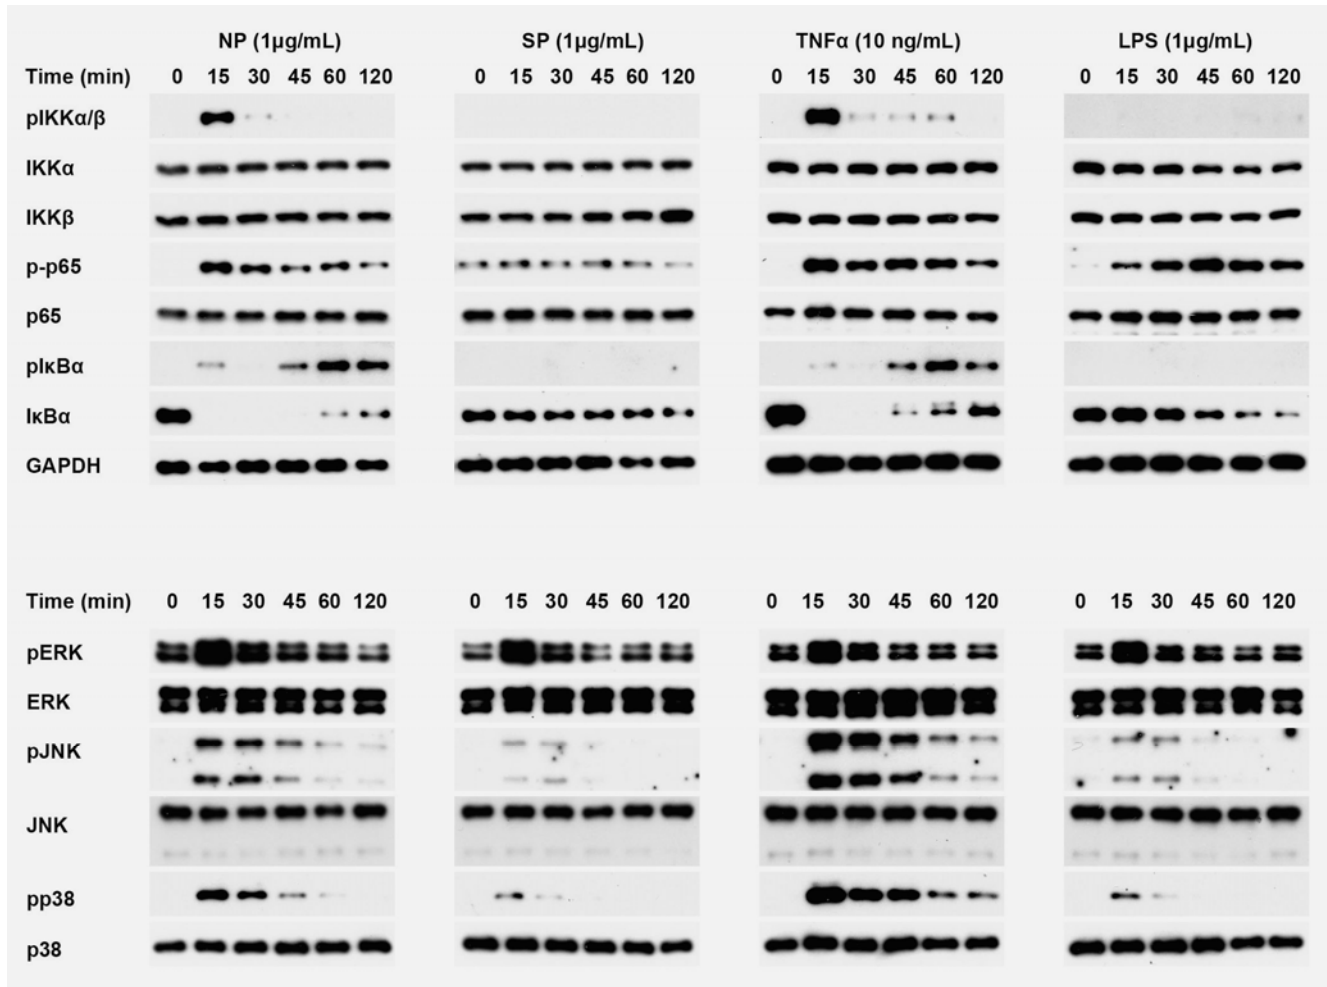

519  
520  
521  
522  
523  
524  
525  
526  
527  
528  
529  
530  
531  
532  
533  
534

**Figure 2. N protein activated NF-κB and MAPK signaling pathways in human endothelial cells.** HLMECs were incubated with NP (1 μg/ml), SP (1 μg/ml), TNFα (10 ng/ml) and LPS (1 μg/ml) respectively for indicated times. The phosphorylation of IKKs, p65, IκBα, ERK, JNK and p38, as well as IκBα degradation were detected by western blot. GAPDH was served as loading control.

535  
536

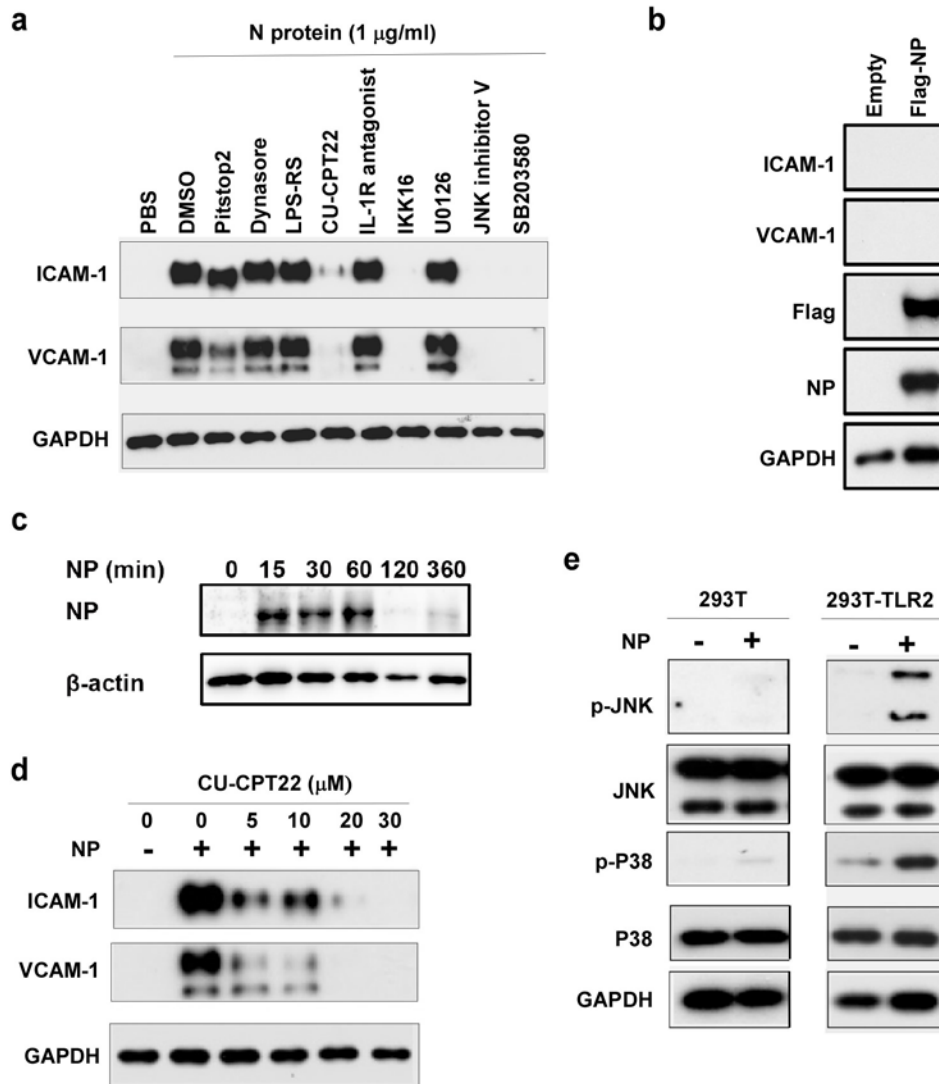

537  
538  
539  
540  
541  
542  
543  
544  
545  
546  
547  
548  
549  
550  
551  
552  
553  
554  
555

**Figure 3. N protein induced endothelial cell activation via TLR2-mediated signaling pathway. (a)** HLMECs were pretreated with inhibitors of endocytosis (Pitstop2, 12.5 µM and Dynasore hydrate, 12.5 µM) and antagonists of TLR4 (LPS-RS, 10 µg/mL), TLR2 (CU-CPT22, 20 µM), IL-1R (IL-1R antagonist, 20 µM), inhibitors of IKK (IKK16, 20 µM), ERK (U0126, 20 µM), JNK (JNK inhibitor V, 20 µM) and p38 (SB203580, 20 µM) for 1 h followed by treatment with NP (1 µg/mL) for 8 hrs. **(b)** The Flag control and Flag-NP expression plasmids were transfected into HLMECs by electroporation respectively. The whole cell lysate was harvested after 48 h transfection. The expression of ICAM-1, VCAM-1, NP and Flag was detected by western blot. **(c)** HMVECs were incubated with NP (1 µg/mL) for different time as indicated. After washing, the cells were harvested and NP was detected by western blot. **(d)** HLMECs were treated with indicated concentrations of CU-CPT22 for 1 h followed by treatment of NP (1 µg/mL) for 8 hrs. **(e)** Wild type (left) and TLR2-overexpressed 293T cells were treated with or without NP (1 µg/mL) for 15 min. The pJNK and pP38 were detected by western blot. GAPDH was served as loading control. All of experiments have been repeated at least one time.

556  
557

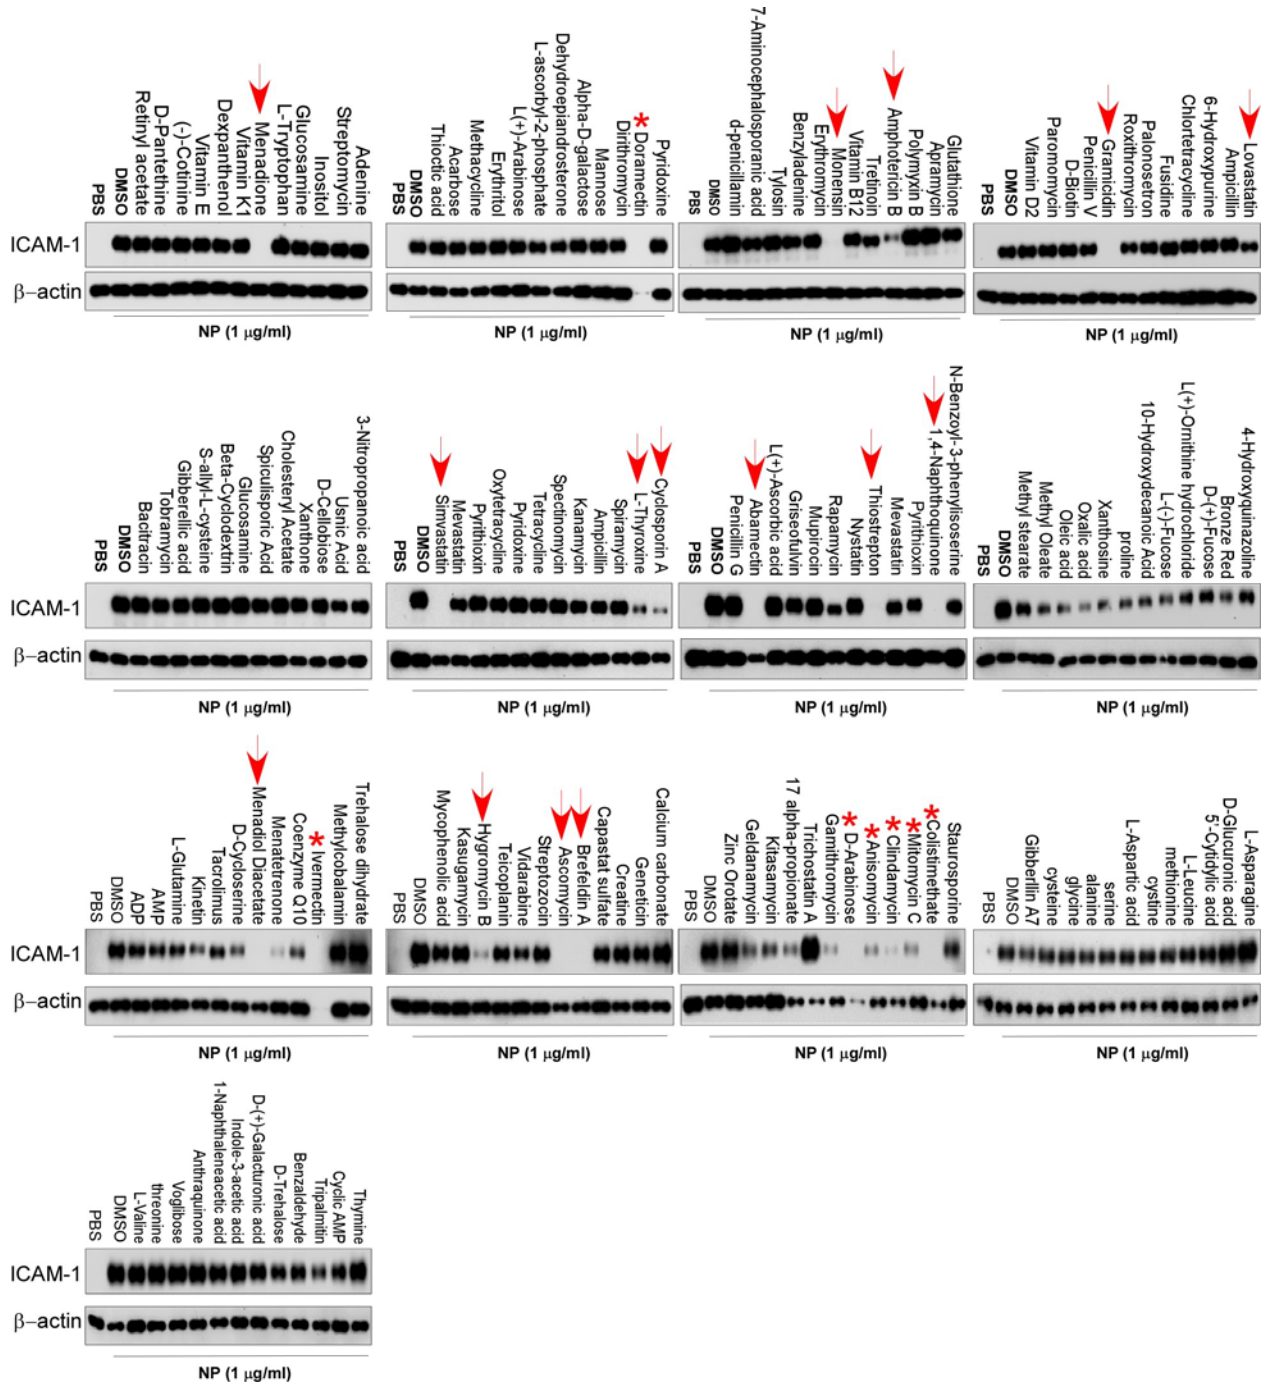

558  
559  
560  
561  
562  
563  
564  
565  
566  
567  
568

**Figure 4. Screening of chemicals for inhibition of N protein-induced endothelial activation.** A total of 155 chemicals from microbial natural product library were added into HLMECs at 30 μM 1 hour before the induction of N protein (1 μg/ml). The effect of chemicals on endothelial activation was measured by Western blot with anti-ICAM-1 antibody. β-actin was served as loading control. Arrow points out the effective compounds; stars point out the toxic compounds causing cell death. The experiments has been repeated for one more time.

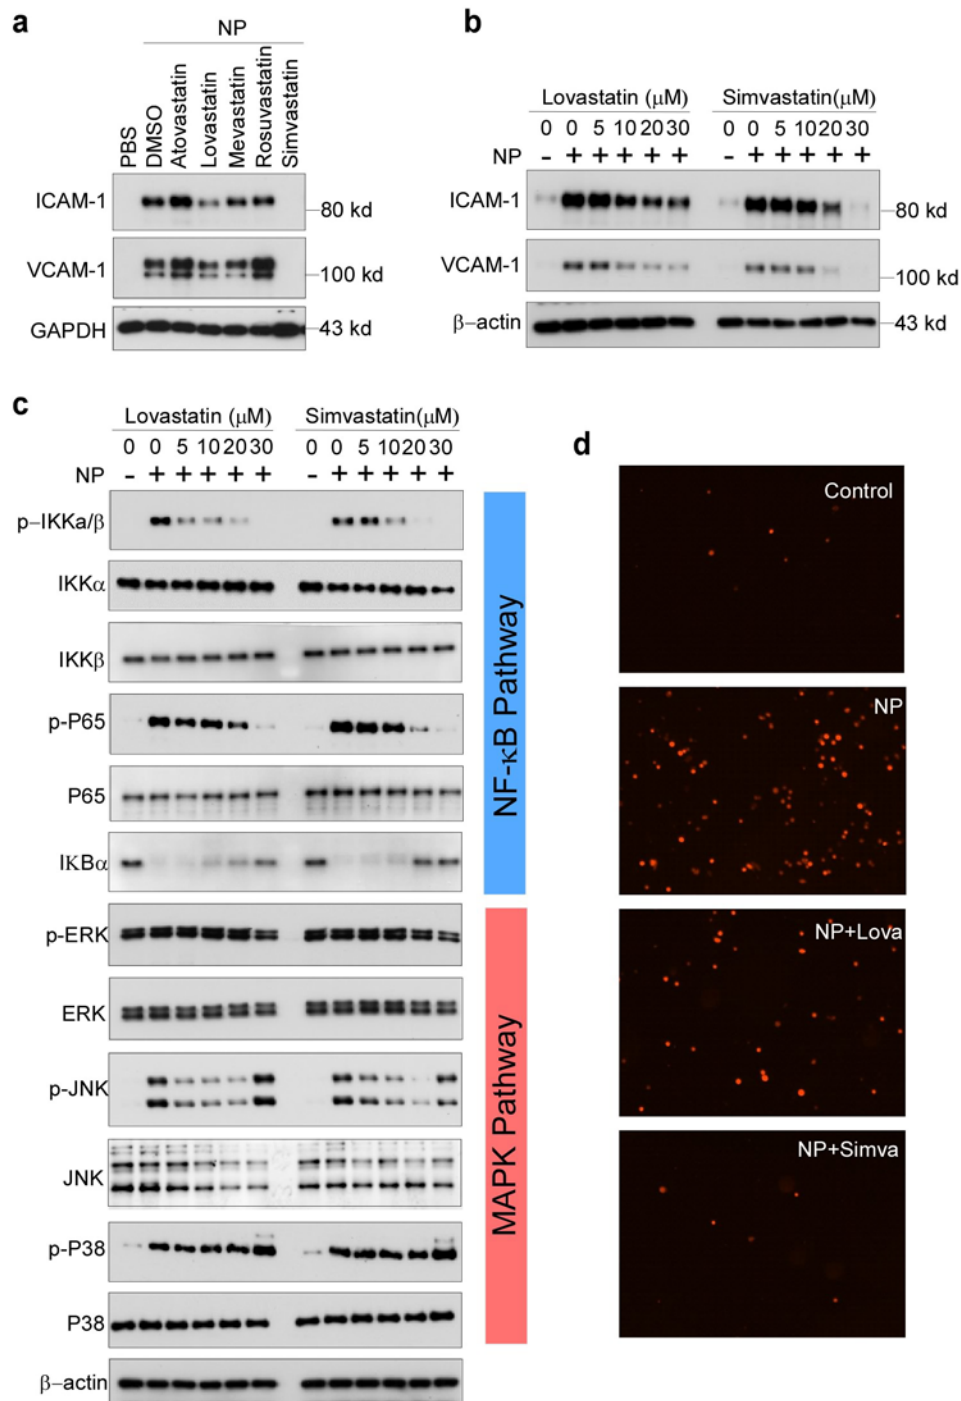

569  
570

571 **Figure 5. Simvastatin is an effective inhibitor of N protein-induced endothelial activation in vitro.** (a)  
572 HLMECs were pretreated with simvastatin, lovastatin, atorvastatin, mevastatin and rosuvastatin at 30  $\mu$  M for 1  
573 h followed by treatment with NP (1  $\mu$  g/mL) for 8 hrs. (b) HLMECs were pretreated with indicated  
574 concentrations of Lovastatin and Simvastatin for 1 h followed by treatment with NP (1  $\mu$  g/mL) for 8 hrs. The  
575 expression of ICAM-1 and VCAM-1 was detected by western blot. (c) HLMECs were pretreated with indicated  
576 concentrations of Lovastatin and Simvastatin for 1 h by treatment with NP (1  $\mu$  g/mL) for 15 mins. The  
577 activation of NF- $\kappa$ B and MAPK signal pathways was detected by western blot. (d) HLMECs were pretreated  
578 with or without Lovastatin (Lova) or Simvastatin (Simva) followed by treatment with NP (1  $\mu$  g/ml) for 8 hours  
579 and then co-cultured with Zombie Red-labeled THP-1 cells for 1 h. After washing, the adherent cells were  
580 imaged.



581  
582  
583  
584

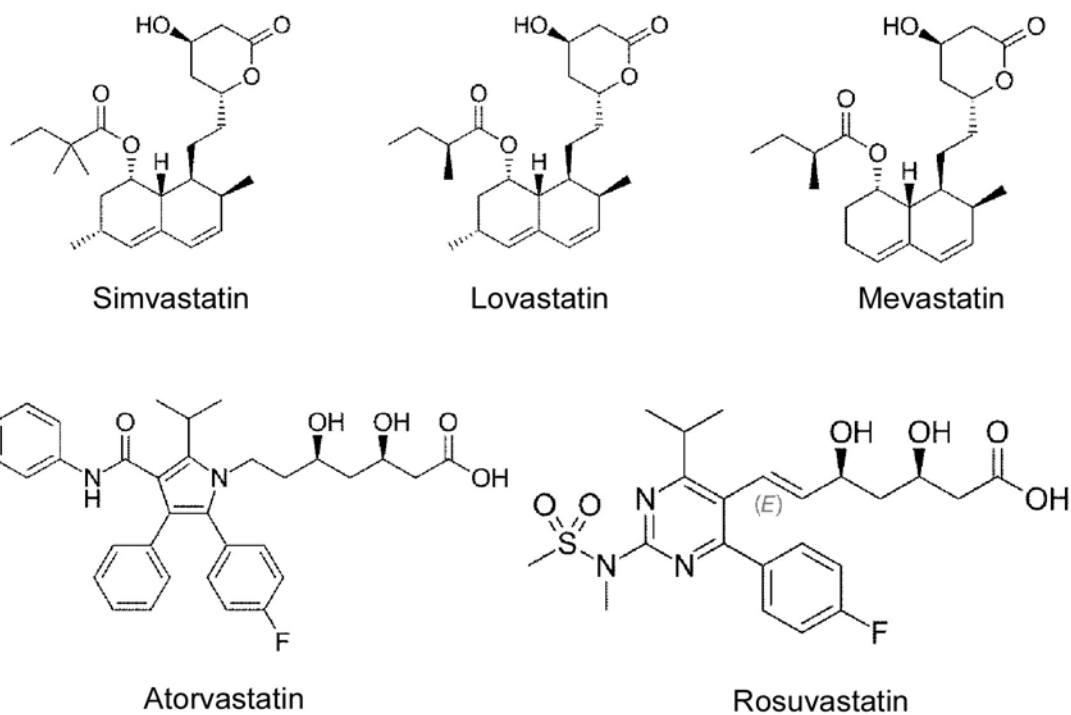

585  
586  
587  
588  
589  
590  
591  
592  
593  
594  
595  
596  
597  
598  
599  
600  
601  
602  
603  
604  
605  
606  
607  
608  
609  
610  
611  
612  
613

**Figure 6.** Chemical structures of Simvastatin, Lovastatin, Mevastatin, Atorvastatin and Rosuvastatin (adapted from Wikipedia).

614  
615  
616

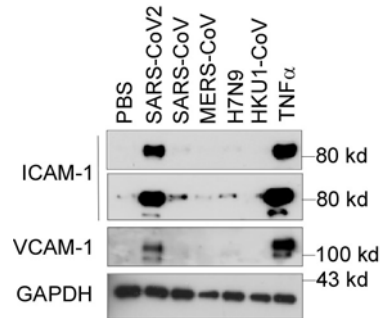

617  
618  
619  
620  
621  
622  
623  
624  
625  
626  
627  
628  
629  
630  
631  
632  
633  
634  
635  
636  
637  
638  
639  
640  
641  
642  
643  
644  
645  
646  
647  
648  
649  
650  
651  
652  
653  
654  
655  
656  
657

**Figure. 7. The N protein from SARS-CoV2 but not the other coronaviruses potently induced endothelial cell activation.** HLMECs were treated with or without five different recombinant viral N proteins (1  $\mu$ g/mL) including SARS-CoV2, SARS-CoV, MERS-CoV, H7N9 and HKU1-CoV for 8 hrs. The expression of ICAM-1 and VCAM-1 was detected by western blot. TNF $\alpha$  (10 ng/mL) was served as a positive control. GAPDH was served as loading control. The experiments were repeated at least one more time.

658  
659  
660  
661  
662

**Table S1.** Primers used in QPCR reactions

| Gene                | Forward primer (5' → 3') | Reverse primer (5' → 3') |
|---------------------|--------------------------|--------------------------|
| Human ICAM-1        | AGCTTCGTGTCCTGTATGGC     | TTTTCTGGCCACGTCCAGTT     |
| Human VCAM-1        | TGTTTGCAGCTTCTCAAGCTTTT  | GATGTGGTCCCCTCATTTCGT    |
| Human TNF- $\alpha$ | TCTCGCACCCCGAGTGA        | GGAGCTGCCCCTCAGCTT       |
| Human MCP1          | CAGCCAGATGCAATCAATGCC    | TGGAATCCTGAACCCACTTCT    |
| Human IL-1 $\beta$  | CCACAGACCTTCCAGGAGAATG   | ATCCCATGTGTCGAAGAAGATAGG |
| Human E-Selectin    | GGCAGTTCCGGGAAAGATCA     | GTGGGAGCTTCACAGGTAGG     |

663  
664
